# Supplementary material
Source: Research Square preprint supplement (doi:10.21203/rs.3.rs-9996788/v2)
Supplement: Supplementary file 1 [file 02e5b92b9c8c0abe7442b647.docx]

# **APPENDIX A. List of Primary Studies Included in the Systematic Literature Review**

[S1] Sedaghatbaf, A., & Abdollahi Azgomi, M. (2018). A method for evaluation of software architecture. Computing, 100(2), 119-150.

[S2] Reggio, G., Ricca, F., Scanniello, G., Cerbo, F. D., & Dodero, G. (2015). On the comprehension of workflows modeled with a precise style: results from a family of controlled experiments. Software & Systems Modeling, 14(4), 1481-1504., doi: 10.1007/s10270-013-0386-9.

[S3] Nisa, H., Imtiaz, S., Khan, M. U., & Imtiaz, S. (2016). Impact of Domain Modeling Techniques on the Quality of Domain Model: An Experiment. Development, 2, 6, doi: 10.14569/ijacsa.2016.071158.

[S4] Sabharwal, S., Kaur, P., & Sibal, R. (2018). Applying Page Rank and HITS Algorithm to Identify Key Use Cases. Journal of Applied Science and Engineering, 21(4), 655-662, doi: 10.6180/jase.201812_21(4).0019.

[S5] Misbhauddin, M., & Alshayeb, M. (2019). An integrated metamodel-based approach to software model refactoring. Software & Systems Modeling, 18(3), 2013-2050, doi: 10.1007/s10270-017-0628-3.

[S6] Bera, P., Burton-Jones, A., & Wand, Y. (2018). Improving the representation of roles in conceptual modeling: theory, method, and evidence. Requirements Engineering, 23(4), 465-491, doi: 10.1007/s00766-017-0275-9.

[S7] Siau, K., & Tian, Y. (2009). A semiotic analysis of unified modeling language graphical notations. Requirements Engineering, 14(1), 15-26, doi: 10.1007/s00766-008-0071-7.

[S8] Iqbal, S., Al-Azzoni, I., Allen, G., & Khan, H. U. (2020). Extending UML use case diagrams to represent non-interactive functional requirements. E-Informatica Software Engineering Journal, 14(1), doi: 10.37190/E-INF200104.

[S9] Hafeez, A., Musavi, S. H. A., & ur Rehman, A. (2018). Ontology-based verification of UML class/OCL model. Mehran University Research Journal of Engineering & Technology, 37(4), 521-534, doi: 10.22581/muet1982.1804.07.

[S10] Matulevičius, R., Lakk, H., & Lepmets, M. (2011). An approach to assess and compare quality of security models. Computer Science and Information Systems, 8(2), 447-476, doi: 10.2298/CSIS101231014M.

[S11] Desai, N., & Gogolla, M. (2019). Developing Comprehensive Postconditions Through a Model Transformation Chain. J. Object Technol., 18(3), 5-1, doi: 10.5381/jot.2019.18.3.a5.

[S12] Shen, Z., Tan, S., & Siau, K. (2018). Challenges in learning unified modeling language: From the perspective of diagrammatic representation and reasoning. Association for Information Systems, doi: 10.17705/1CAIS.04330.

[S13] Bera, P., & Poels, G. (2017). The Effects of Construct Redundancy on Readers' Understanding of Conceptual Models. Journal of Database Management (JDM), 28(3), 1-25, doi: 10.4018/JDM.2017070101.

[S14] Syn, T., & Batra, D. (2013). Improving sequence diagram modeling performance: a technique based on chunking, ordering, and patterning. Journal of Database Management (JDM), 24(4), 1-25, doi: 10.4018/JDM.2013100101.

[S15] VanderMeer, D. (2009). Applying learner-centered design principles to UML sequence diagrams. Journal of Database Management (JDM), 20(1), 25-47, doi: 10.4018/jdm.2009010102.

[S16] Reinhartz-Berger, I., & Sturm, A. (2008). Enhancing UML models: a domain analysis approach. Journal of Database Management (JDM), 19(1), 74-94, doi: 10.4018/jdm.2008010104.

[S17] Loucopoulos, P., & Kadir, W. M. N. W. (2008). BROOD: business rules-driven object-oriented design. Journal of Database Management (JDM), 19(1), 41-73.

[S18] Dolques, X., Huchard, M., Nebut, C., & Reitz, P. (2012). Fixing generalization defects in UML use case diagrams. Fundamenta Informaticae, 115(4), 327-356, doi: 10.3233/FI-2012-658.

[S19] Burton-Jones, A., & Meso, P. N. (2006). Conceptualizing systems for understanding: An empirical test of decomposition principles in object-oriented analysis. Information Systems Research, 17(1), 38-60, doi: 10.1287/isre.1050.0079.

[S20] Marín, B., Giachetti, G., Pastor, O., Vos, T. E., & Abran, A. (2013). Using a functional size measurement procedure to evaluate the quality of models in MDD environments. ACM Transactions on Software Engineering and Methodology (TOSEM), 22(3), 1-31., doi: 10.1145/2491509.2491520.

[S21] Queralt, A., & Teniente, E. (2012). Verification and validation of UML conceptual schemas with OCL constraints. ACM Transactions on Software Engineering and Methodology (TOSEM), 21(2), 1-41., doi: 10.1145/2089116.2089123.

[S22] Wimmer, M., Schauerhuber, A., Kappel, G., Retschitzegger, W., Schwinger, W., & Kapsammer, E. (2011). A survey on UML-based aspect-oriented design modeling. ACM Computing Surveys (CSUR), 43(4), 1-33, doi: 10.1145/1978802.1978807.

[S23] Egyed, A. (2002). Automated abstraction of class diagrams. ACM Transactions on Software Engineering and Methodology (TOSEM), 11(4), 449-491, doi: 10.1145/606612.606616.

[S24] Dao, T. H., Nguyen, X. T., & Truong, N. T. (2019). Preservation of Class invariants in refactoring UML models. International Journal of Software Engineering and Knowledge Engineering, 29(02), 221-244., doi: 10.1142/S0218194019500104.

[S25] Ramaraj, E., & Duraisamy, S. (2007). Design optimization metrics for uml based object-oriented systems. International Journal of Software Engineering and Knowledge Engineering, 17(03), 423-448., doi: 10.1142/S0218194007003252.

[S26] Lakshminarayana, A., & Newman, T. S. (2000). Three-dimensional visualization of object-oriented software design metrics. Journal of Electronic Imaging, 9(4), 368-374, doi: 10.1117/1.1289353.

[S27] Autili, M., Bertolino, A., De Angelis, G., Di Ruscio, D., & Di Sandro, A. (2015). A tool-supported methodology for validation and refinement of early-stage domain models. IEEE Transactions on Software Engineering, 42(1), 2-25, doi: 10.1109/TSE.2015.2449319.

[S28] El-Attar, M., Luqman, H., Karpati, P., Sindre, G., & Opdahl, A. L. (2015). Extending the UML statecharts notation to model security aspects. IEEE Transactions on Software Engineering, 41(7), 661-690., doi: 10.1109/TSE.2015.2396526.

[S29] Samuel, B. M., Watkins III, L. A., Ehle, A., & Khatri, V. (2014). Customizing the representation capabilities of process models: Understanding the effects of perceived modeling impediments. IEEE Transactions on Software Engineering, 41(1), 19-39, doi: 10.1109/TSE.2014.2354043.

[S30] Abrahao, S., Gravino, C., Insfran, E., Scanniello, G., & Tortora, G. (2012). Assessing the effectiveness of sequence diagrams in the comprehension of functional requirements: Results from a family of five experiments. IEEE transactions on software engineering, 39(3), 327-342., doi: 10.1109/TSE.2012.27.

[S31] Ricca, F., Di Penta, M., Torchiano, M., Tonella, P., & Ceccato, M. (2009). How developers' experience and ability influence web application comprehension tasks supported by uml stereotypes: A series of four experiments. IEEE Transactions on Software Engineering, 36(1), 96-118, doi: 10.1109/TSE.2009.69.

[S32] Davis, J. P., & Bonnell, R. D. (2007). Propositional logic constraint patterns and their use in UML-based conceptual modeling and analysis. IEEE Transactions on Knowledge and Data Engineering, 19(3), 427-440, doi: 10.1109/TKDE.2007.45.

[S33] Shin, S. S. (2014). A study on the difficulties of learning phase transition in object-oriented analysis and design from the viewpoint of semantic distance. IEEE Transactions on Education, 58(2), 117-123, doi: 10.1109/TE.2014.2334556.

[S34] Karasneh, B., Jolak, R., & Chaudron, M. R. (2015, December). Using examples for teaching software design: an experiment using a repository of UML class diagrams. In 2015 Asia-Pacific Software Engineering Conference (APSEC) (pp. 261-268). IEEE, doi: 10.1109/APSEC.2015.59.

[S35] Motschnig-Pitrik, R., & Kaasboll, J. (1999). Part-whole relationship categories and their application in object-oriented analysis. IEEE Transactions on Knowledge and Data Engineering, 11(5), 779-797, doi: 10.1109/69.806936.

[S36] Diamantopoulos, T., & Symeonidis, A. (2018). Enhancing requirements reusability through semantic modeling and data mining techniques. Enterprise information systems, 12(8-9), 960-981, doi: 10.1080/17517575.2017.1416177.

[S37] Bera, P., & Poels, G. (2019). How quickly do we learn conceptual models?. European Journal of Information Systems, 28(6), 663-680, doi: 10.1080/0960085X.2019.1673972.

[S38] Reinhartz-Berger, I., & Dori, D. (2005). OPM vs. UML-Experimenting with Comprehension and Construction of Web Application Models. Empirical Software Engineering, 10(1), 57-80, doi: 10.1023/B:EMSE.0000048323.40484.e0.

[S39] Robbins, J. E., & Redmiles, D. F. (2000). Cognitive support, UML adherence, and XMI interchange in Argo/UML. Information and Software Technology, 42(2), 79-89, doi: 10.1016/S0950-5849(99)00083-X.

[S40] Otero, M. C., & Dolado, J. J. (2004). Evaluation of the comprehension of the dynamic modeling in UML. Information and Software Technology, 46(1), 35-53, doi: 10.1016/S0950-5849(03)00108-3.

[S41] Laitenberger, O., Atkinson, C., Schlich, M., & El Emam, K. (2000). An experimental comparison of reading techniques for defect detection in UML design documents. Journal of Systems and Software, 53(2), 183-204, doi: 10.1016/S0164-1212(00)00052-2.

[S42] Heuer, A., Stricker, V., Budnik, C. J., Konrad, S., Lauenroth, K., & Pohl, K. (2013). Defining variability in activity diagrams and Petri nets. Science of Computer Programming, 78(12), 2414-2432, doi: 10.1016/j.scico.2012.06.003.

[S43] Torchiano, M., Scanniello, G., Ricca, F., Reggio, G., & Leotta, M. (2017). Do UML object diagrams affect design comprehensibility? Results from a family of four controlled experiments. Journal of Visual Languages & Computing, 41, 10-21, doi: 10.1016/j.jvlc.2017.06.002.

[S44] Scanniello, G., & Erra, U. (2014). Distributed modeling of use case diagrams with a method based on think-pair-square: Results from two controlled experiments. Journal of Visual Languages & Computing, 25(4), 494-517, doi: 10.1016/j.jvlc.2014.03.002.

[S45] Byelas, H., & Telea, A. (2009). Towards realism in drawing areas of interest on architecture diagrams. Journal of Visual Languages & Computing, 20(2), 110-128, doi: 10.1016/j.jvlc.2008.09.001.

[S46] El-Attar, M. (2019). Evaluating and empirically improving the visual syntax of use case diagrams. Journal of Systems and Software, 156, 136-163, doi: 10.1016/j.jss.2019.06.096.

[S47] Cabot, J., Clarisó, R., & Riera, D. (2014). On the verification of UML/OCL class diagrams using constraint programming. Journal of Systems and Software, 93, 1-23, doi: 10.1016/j.jss.2014.03.023.

[S48] Staron, M., Kuzniarz, L., & Wohlin, C. (2006). Empirical assessment of using stereotypes to improve comprehension of UML models: A set of experiments. Journal of Systems and Software, 79(5), 727-742, doi: 10.1016/j.jss.2005.09.014.

[S49] Otero, M. C., & Dolado, J. J. (2005). An empirical comparison of the dynamic modeling in OML and UML. Journal of Systems and Software, 77(2), 91-102, doi: 10.1016/j.jss.2004.11.022.

[S50] J Cruz-Lemus, J. A., Maes, A., Genero, M., Poels, G., & Piattini, M. (2010). The impact of structural complexity on the understandability of UML statechart diagrams. Information Sciences, 180(11), 2209-2220, doi: 10.1016/j.ins.2010.01.026.

[S51] Burgueño, L., Mayerhofer, T., Wimmer, M., & Vallecillo, A. (2019). Specifying quantities in software models. Information and Software Technology, 113, 82-97, doi: 10.1016/j.infsof.2019.05.006.

[S52] George, R., & Samuel, P. (2018). Fixing class design inconsistencies using self-regulating particle swarm optimization. Information and Software Technology, 99, 81-92, doi: 10.1016/j.infsof.2018.03.005.

[S53] G Sedrakyan, G., Poelmans, S., & Snoeck, M. (2017). Assessing the influence of feedback-inclusive rapid prototyping on understanding the semantics of parallel UML statecharts by novice modellers. Information and Software Technology, 82, 159-172, doi: 10.1016/j.infsof.2016.11.001.

[S54] Saleh, F., & El-Attar, M. (2015). A scientific evaluation of the misuse case diagrams visual syntax. Information and Software Technology, 66, 73-96, doi: 10.1016/j.infsof.2015.05.002.

[S55] Blouin, A., Moha, N., Baudry, B., Sahraoui, H., & Jézéquel, J. M. (2015). Assessing the use of slicing-based visualizing techniques on the understanding of large metamodels. Information and Software Technology, 62, 124-142, doi: 10.1016/j.infsof.2015.02.007.

[S56] Felderer, M., & Herrmann, A. (2015). Manual test case derivation from UML activity diagrams and state machines: A controlled experiment. Information and Software Technology, 61, 1-15, doi: 10.1016/j.infsof.2014.12.005.

[S57] Hadar, I., Reinhartz-Berger, I., Kuflik, T., Perini, A., Ricca, F., & Susi, A. (2013). Comparing the comprehensibility of requirements models expressed in Use Case and Tropos: Results from a family of experiments. Information and Software Technology, 55(10), 1823-1843, doi: 10.1016/j.infsof.2013.05.003.

[S58] Al Dallal, J., & Briand, L. C. (2010). An object-oriented high-level design-based class cohesion metric. Information and software technology, 52(12), 1346-1361, doi: 10.1016/j.infsof.2010.08.006.

[S59] Muñoz, L., Mazón, J. N., & Trujillo, J. (2010). A family of experiments to validate measures for UML activity diagrams of ETL processes in data warehouses. Information and Software Technology, 52(11), 1188-1203, doi: 10.1016/j.infsof.2010.06.003.

[S60] Eichelberger, H., & Schmid, K. (2009). Guidelines on the aesthetic quality of UML class diagrams. Information and Software Technology, 51(12), 1686-1698, doi: 10.1016/j.infsof.2009.04.008.

[S61] Nugroho, A. (2009). Level of detail in UML models and its impact on model comprehension: A controlled experiment. Information and Software Technology, 51(12), 1670-1685, doi: 10.1016/j.infsof.2009.04.007.

[S62] Glezer, C., Last, M., Nachmany, E., & Shoval, P. (2005). Quality and comprehension of UML interaction diagrams-an experimental comparison. Information and Software Technology, 47(10), 675-692, doi: 10.1016/j.infsof.2005.01.003.

[S63] Bolloju, N., & Sugumaran, V. (2012). A knowledge-based object modeling advisor for developing quality object models. Expert Systems with Applications, 39(3), 2893-2906, doi: 10.1016/j.eswa.2011.08.151.

[S64] Aguilera, D., Gómez, C., & Olivé, A. (2013). A complete set of guidelines for naming UML conceptual schema elements. Data & Knowledge Engineering, 88, 60-74, doi: 10.1016/j.datak.2013.09.001.

[S65] Tort, A., & Olivé, A. (2010). An approach to testing conceptual schemas. Data & Knowledge Engineering, 69(6), 598-618, doi: 10.1016/j.datak.2010.02.002.

[S66] Opdahl, A. L., & Henderson-Sellers, B. (2005). A unified modelling language without referential redundancy. Data & Knowledge Engineering, 55(3), 277-300, doi: 10.1016/j.datak.2004.12.007.

[S67] Jošt, G., Huber, J., Heričko, M., & Polančič, G. (2016). An empirical investigation of intuitive understandability of process diagrams. Computer Standards & Interfaces, 48, 90-111, doi: 10.1016/j.csi.2016.04.006.

[S68] Wenzel, S., Poggenpohl, D., Jürjens, J., & Ochoa, M. (2014). Specifying model changes with UMLchange to support security verification of potential evolution. Computer Standards & Interfaces, 36(4), 776-791, doi: 10.1016/j.csi.2013.12.011.

[S69] Haug, A., Hvam, L., & Mortensen, N. H. (2010). A layout technique for class diagrams to be used in product configuration projects. Computers in Industry, 61(5), 409-418, doi: 10.1016/j.compind.2009.10.002.

[S70] Gogolla, M., Hilken, F., & Doan, K. H. (2018). Achieving model quality through model validation, verification and exploration. Computer Languages, Systems & Structures, 54, 474-511, doi: 10.1016/j.cl.2017.10.001.

[S71] Planas, E., Cabot, J., & Gómez, C. (2016). Lightweight and static verification of UML executable models. Computer Languages, Systems & Structures, 46, 66-90, doi: 10.1016/j.cl.2016.07.002.

[S72] Kchaou, D., Bouassida, N., & Ben-Abdallah, H. (2016). Managing the impact of UML design changes on their consistency and quality. Arabian Journal for Science and Engineering, 41(8), 2863-2881, doi: 10.1007/s13369-016-2040-7.

[S73] Zafar, N. A. (2016). Formal specification and verification of few combined fragments of UML sequence diagram. Arabian Journal for Science and Engineering, 41(8), 2975-2986, doi: 10.1007/s13369-015-1999-9.

[S74] López-Fernández, Guerra, and De Lara. (2014). Assessing the quality of meta-models, CEUR Workshop Proc., vol. 1235, no. 4, pp. 3–12, 2014.

[S75] Felderer, M., & Herrmann, A. (2019). Comprehensibility of system models during test design: a controlled experiment comparing UML activity diagrams and state machines. Software Quality Journal, 27(1), 125-147, doi: 10.1007/s11219-018-9407-9.

[S76] Ganser, A., Lichter, H., Roth, A., & Rumpe, B. (2016). Staged model evolution and proactive quality guidance for model libraries. Software Quality Journal, 24(3), 675-708, doi: 10.1007/s11219-015-9298-y.

[S77] Choi, J., Jee, E., & Bae, D. H. (2016). Timing consistency checking for UML/MARTE behavioral models. Software Quality Journal, 24(3), 835-876, doi: 10.1007/s11219-015-9290-6.

[S78] Mansoor, U., Kessentini, M., Wimmer, M., & Deb, K. (2017). Multi-view refactoring of class and activity diagrams using a multi-objective evolutionary algorithm. Software Quality Journal, 25(2), 473-501, doi: 10.1007/s11219-015-9284-4.

[S79] Phalp, K. T., Vincent, J., & Cox, K. (2007). Assessing the quality of use case descriptions. Software Quality Journal, 15(1), 69-97, doi: 10.1007/s11219-006-9006-z.

[S80] Khan, Y. A., & El-Attar, M. (2016). Using model transformation to refactor use case models based on antipatterns. Information systems frontiers, 18(1), 171-204, doi: 10.1007/s10796-014-9528-z.

[S81] Amálio, N., Briand, L., & Kelsen, P. (2020). An experimental scrutiny of visual design modelling: VCL up against UML+ OCL. Empirical Software Engineering, 25(2), 1205-1258, doi: 10.1007/s10664-019-09784-9.

[S82] I Reinhartz-Berger, I., & Sturm, A. (2014). Comprehensibility of UML-based software product line specifications. Empirical Software Engineering, 19(3), 678-713.

[S83] De Lucia, A., Gravino, C., Oliveto, R., & Tortora, G. (2010). An experimental comparison of ER and UML class diagrams for data modelling. Empirical Software Engineering, 15(5), 455-492, doi: 10.1007/s10664-009-9127-7.

[S84] Cepeda Porras, G., & Guéhéneuc, Y. G. (2010). An empirical study on the efficiency of different design pattern representations in UML class diagrams. Empirical Software Engineering, 15(5), 493-522, doi: 10.1007/s10664-009-9125-9.

[S85] Cruz-Lemus, J. A., Genero, M., Manso, M. E., Morasca, S., & Piattini, M. (2009). Assessing the understandability of UML statechart diagrams with composite states—A family of empirical studies. Empirical Software Engineering, 14(6), 685-719, doi: 10.1007/s10664-009-9106-z.

[S86] Genero, M., Manso, E., Visaggio, A., Canfora, G., & Piattini, M. (2007). Building measure-based prediction models for UML class diagram maintainability. Empirical Software Engineering, 12(5), 517-549.

[S87] Bunse, C. (2006). Using patterns for the refinement and translation of UML models: A controlled experiment. Empirical Software Engineering, 11(2), 227-267, doi: 10.1007/s10664-006-6403-7.

[S88] Anda, B., & Sjøberg, D. I. (2005). Investigating the role of use cases in the construction of class diagrams. Empirical Software Engineering, 10(3), 285-309, doi: 10.1007/s10664-005-1289-3.

[S89] Balaban, M., & Maraee, A. (2019). Removing redundant multiplicity constraints in UML class models. Software & Systems Modeling, 18(4), 2717-2751, doi: 10.1007/s10270-018-0696-z.

[S90] Chatzigeorgiou, A. (2003). Mathematical assessment of object-oriented design quality. IEEE Transactions on Software Engineering, 29(11), 1050-1053, doi: 10.1109/TSE.2003.1245306.

[S91] Mens, T., Decan, A., & Spanoudakis, N. I. (2019). A method for testing and validating executable statechart models. Software & Systems Modeling, 18(2), 837-863, doi: 10.1007/s10270-018-0676-3.

[S92] D Zayan, D., Sarkar, A., Antkiewicz, M., Maciel, R. S. P., & Czarnecki, K. (2019). Example-driven modeling: on effects of using examples on structural model comprehension, what makes them useful, and how to create them. Software & Systems Modeling, 18(3), 2213-2239, doi: 10.1007/s10270-017-0652-3.

[S93] Störrle, H. (2018). On the impact of size to the understanding of UML diagrams. Software & Systems Modeling, 17(1), 115-134, doi: 10.1007/s10270-016-0529-x.

[S94] Balaban, M., Maraee, A., Sturm, A., & Jelnov, P. (2015). A pattern-based approach for improving model quality. Software & Systems Modeling, 14(4), 1527-1555, doi: 10.1007/s10270-013-0390-0.

[S95] Bavota, G., Gravino, C., Oliveto, R., De Lucia, A., Tortora, G., Genero, M., & Cruz-Lemus, J. A. (2015). A fine-grained analysis of the support provided by UML class diagrams and ER diagrams during data model maintenance. Software & Systems Modeling, 14(1), 287-306, doi: 10.1007/s10270-012-0312-6.

[S96] Ali, S., Yue, T., & Briand, L. C. (2014). Does aspect-oriented modeling help improve the readability of UML state machines?. Software & Systems Modeling, 13(3), 1189-1221.

[S97] El-Attar, M., & Miller, J. (2010). Improving the quality of use case models using antipatterns. Software & systems modeling, 9(2), 141-160, doi: 10.1007/s10270-009-0112-9.

[S98] Beimel, D., & Kedmi-Shahar, E. (2019). Improving the identification of functional system requirements when novice analysts create use case diagrams: the benefits of applying conceptual mental models. Requirements Engineering, 24(4), 483-502, doi: 10.1007/s00766-018-0296-z.

[S99] Bera, P., & Evermann, J. (2014). Guidelines for using UML association classes and their effect on domain understanding in requirements engineering. Requirements Engineering, 19(1), 63-80, doi: 10.1007/s00766-012-0159-y.

[S100] Dahan, M., Shoval, P., & Sturm, A. (2014). Comparing the impact of the OO-DFD and the Use Case methods for modeling functional requirements on comprehension and quality of models: a controlled experiment. Requirements Engineering, 19(1), 27-43, doi: 10.1007/s00766-012-0155-2.

[S101] Bolloju, N., & Alter, S. (2016). Better use case diagrams by using work system snapshots. International Journal of Information Technologies and Systems Approach (IJITSA), 9(2), 1-22, doi: 10.4018/IJITSA.2016070101.

[S102] Baudry, B., & Le Traon, Y. (2005). Measuring design testability of a UML class diagram. Information and software technology, 47(13), 859-879, doi: 10.1016/j.infsof.2005.01.006.

[S103] Burgués, X., Franch, X., & Ribó, J. M. (2008). Improving the accuracy of UML metamodel extensions by introducing induced associations. Software & Systems Modeling, 7(3), 361-379, doi: 10.1007/s10270-007-0062-z.

[S104] Boot, W. R., Dunn, C. L., Fulmer, B. P., Gerard, G. J., & Grabski, S. V. (2022). An eye tracking experiment investigating synonymy in conceptual model validation. International Journal of Accounting Information Systems, 47, 100578, doi: https://doi.org/10.1016/j.accinf.2022.100578.

[S105] Sharbaf, M., Zamani, B., & Sunyé, G. (2022). Automatic resolution of model merging conflicts using quality-based reinforcement learning. Journal of Computer Languages, 71, 101123, doi: https://doi.org/10.1016/j.cola.2022.101123.

[S106] Al-Fedaghi, S. (2021). UML modeling to TM modeling and back. arXiv preprint arXiv:2102.02982, doi: https://doi.org/10.48550/arXiv.2102.02982.

[S107] Barriga, A., Bettini, L., Iovino, L., Rutle, A., & Heldal, R. (2021). Addressing the trade off between smells and quality when refactoring class diagrams. The Journal of Object Technology, 20(3), 1-1., doi: http://dx.doi.org/10.5381/jot.2021.20.3.a1.

[S108] Sanyal, R. (2020). Impact of passive and negative sentences in automatic generation of static UML diagram using NLP. Journal of Intelligent & Fuzzy Systems, 39(2), 2047-2059, doi: http://dx.doi.org/10.3233/JIFS-179871.

[S109] Albaghajati, A., & Hassine, J. (2022). A use case driven approach to game modeling. Requirements Engineering, 1-34, doi: https://doi.org/ http://dx.doi.org/10.1007/s00766-021-00362-4.

[S110] Akiki, P. A., & Maalouf, H. W. (2021). CHECKSUM: tracking changes and measuring contributions in cooperative systems modeling. Software and Systems Modeling, 20(4), 1079-1122, doi: http://dx.doi.org/10.1007/s10270-020-00840-3.

[S111] Flores, P., Alvarez, M., & Torres, J. (2022). Identifying Difficulties of Software Modeling Through Class Diagrams: A Long-Term Comparative Analysis. IEEE Access, 10, 28895-28910, doi: https://doi.org/10.1109/ACCESS.2022.3157290.

[S112] Priyambadha, B., & Katayama, T. (2022). Design Level Class Decomposition using the Threshold-based Hierarchical Agglomerative Clustering. International Journal of Advanced Computer Science and Applications, 13(3) , doi: https://dx.doi.org/10.14569/IJACSA.2022.0130310.

[S113] Ozcan, E., Topalli, D., Tokdemir, G., & Cagiltay, N. E. (2021). A user task design notation for improved software design. PeerJ Computer Science, 7, e503, doi: https://doi.org/10.7717/peerj-cs.503.

[S114] Barriga, A., Heldal, R., Rutle, A., & Iovino, L. (2022). PARMOREL: a framework for customizable model repair. Software and Systems Modeling, 21(5), 1739-1762, doi: https://doi.org/10.1007/s10270-022-01005-0.

[S115] Mahmood, W., Strüber, D., Anjorin, A., & Berger, T. (2022). Effects of variability in models: a family of experiments. Empirical Software Engineering, 27(3), 72, doi: 10.1007/s10664-021-10112-3.

[S116] Beimel, D., Tsoury, A., & Lev, S. B. (2023). Identifying common and persistent errors made by novice analysts when modeling business processes using UML activity diagram: utilizing a hierarchical error classification. Software Quality Journal, 31(4), 1149-1178, doi: s11219-023-09628-2

[S117] Haridy, S., Ismail, R. M., Badr, N., & Hashem, M. (2023). An ontology development methodology based on ontology-driven conceptual modeling and natural language processing: tourism case study. Big Data and Cognitive Computing, 7(2), 101. https://doi.org/10.3390/bdcc7020101

[S118] Feichas, F. A., & Seabra, R. D. (2023). Evaluation of perception of use of a gamified platform from the student perspective: An approach for studying unified modeling language. *Informatics in Education*, *22*(3), 369-394. doi: 10.15388/infedu.2023.22

[S119] Chen, C. Y., & Tai, K. Y. (2023). Online ontological quality assessment of converted UML class diagrams in SRE. *Automated Software Engineering*, *30*(2), 18. doi: 10.1007/s10515-023-00385-x

[S120] Yang, P., Zhang, L., Li, Q., Gao, X., & Yang, Y. (2025). OCLVerifer: Automated verification of OCL contracts in requirements models. *Science of Computer Programming*, *240*, 103197. doi: 10.1016/j.scico.2024.103197

[S121] NASIRI, S., & LAHMER, M. (2024). A Smart AI Framework for Backlog Refinement and UML Diagram Generation. *International Journal of Advanced Computer Science & Applications*, *15*(4). doi: 10.14569/IJACSA.2024.0150474

[S122] Yuan, Z., Hu, X., Zhang, G., & Ma, Z. (2024). Integration of UML Class Diagrams Based on Semantics and Structure. *International Journal of Software Engineering and Knowledge Engineering*, *34*(08), 1281-1312. doi: 10.1142/S021819402450020

[S123] Elekes, M., Molnár, V., & Micskei, Z. (2023). Assessing the specification of modelling language semantics: a study on UML PSSM. *Software Quality Journal*, *31*(2), 575-617. doi: 10.1007/s11219-023-09617-5

[S124] Meliá, S., Reyes, R., & Cachero, C. (2023). The Effect of Developers’ General Intelligence on the Understandability of Domain Models: An Empirical Study. *IEEE Access*, *11*, 70153-70167. doi: 10.1109/ACCESS.2023.3293199

[S125] Li, Q., & Zeng, F. (2024). Enhancing Software Architecture Adaptability: A Comprehensive Evaluation Method. *Symmetry*, *16*(7), 894. doi: 10.3390/sym16070894

[S126] Ahmad, K., Abdelrazek, M., Arora, C., Bano, M., & Grundy, J. (2023). Requirements practices and gaps when engineering human-centered Artificial Intelligence systems. *Applied Soft Computing*, *143*, 110421. doi: 10.1016/j.asoc.2023.110421

[S127] Beimel, D., Tsoury, A., & Lev, S. B. (2023). Identifying common and persistent errors made by novice analysts when modeling business processes using UML activity diagram: utilizing a hierarchical error classification. *Software Quality Journal*, *31*(4), 1149-1178. doi: 10.1007/s11219-023-09628-2

[S128] Garaccione, G., Coppola, R., Ardito, L., & Torchiano, M. (2025). Gamification of conceptual modeling education with UML class diagrams: an experimental analysis. *Software and Systems Modeling*, 1-32. doi: 10.1007/s10270-025-01282-5

[S129] Tsoury, A., Hindy Ling, H., Beimel, D., & Bar-Lev, S. (2025). From omelet to UML: assessing the role of process thinking on process model quality among novice analyst. *Software Quality Journal*, *33*(1), 1-30. doi: 10.1007/s11219-025-09713-8

[S130] Garaccione, G., Coppola, R., Ardito, L., & Torchiano, M. (2025). Gamification of conceptual modeling education: an analysis of productivity and students’ perception. *Software Quality Journal*, *33*(1), 1-19. doi: 10.1007/s11219-024-09701-4

[S131] Ņikiforova, O., Babris, K., & Guliyeva, A. (2024). Definition of a Set of Use Case Patterns for Application Systems: A Prototype-Supported Development Approach. Applied Computer Systems, 29(1), 59-67. doi: 10.2478/acss-2024-0008

[S132] Reinhartz-Berger, I. (2024). Challenges in software model reuse: cross application domain vs. cross modeling paradigm. *Empirical Software Engineering*, *29*(1), 16. doi: 10.1007/s10664-023-10386-9

[S133] Chakraborty, S., & Liebel, G. (2023). We do not understand what it says–studying student perceptions of software modelling. *Empirical Software Engineering*, 28(6), 149. doi: 10.1007/s10664-023-10404-w

[S134] Dang, D. H., Le, D. M., & Le, V. V. (2023). AGL: Incorporating behavioral aspects into domain-driven design. *Information and Software Technology*, *163*, 107284. doi: 10.1016/j.infsof.2023.107284

[S135] Arfi, F., Courbis, A. L., Lambolais, T., Bughin, F., & Hayot, M. (2023). Formal verification of a telerehabilitation system through an abstraction and refinement approach using Uppaal. *IET Software*, *17*(4), 582-599. doi: 10.1049/sfw2.12128

[S136] Bimonte, S., Badir, H., Battistoni, P., Bazza, H., Belhassena, A., Cariou, C., ... & Tricot, N. (2023). Data-centric UML profile for agroecology applications: Agricultural autonomous robots monitoring case study. *Computer Science and Information Systems*, 20(1), 459-489. doi: 10.2298/CSIS220301064B
